# Supplementary material for: Artificial intelligence for improving Nitrogen Dioxide forecasting of Abu Dhabi environment agency ground-based stations
Source: PubMed Central journal article supplement (PMC10236404; doi:10.1186/s40537-023-00754-z), 2023-06-02
Supplement: 40537_2023_754_MOESM1_ESM.pdf [file 40537_2023_754_MOESM1_ESM.pdf]

# Artificial Intelligence for improving Nitrogen Dioxide forecasting of Abu Dhabi environment agency ground-based stations

## Additional information

Table S1: Missing Value Percentages in the 20 UAE monitoring stations

| Station    | Missing Value (Percentage) |
|------------|----------------------------|
| Station 1  | 4.52%                      |
| Station 2  | 3.68%                      |
| Station 3  | 6.80%                      |
| Station 4  | 7.19%                      |
| Station 5  | 7.31%                      |
| Station 6  | 5.83%                      |
| Station 7  | 6.15%                      |
| Station 8  | 1.51%                      |
| Station 9  | 1.56%                      |
| Station 10 | 5.80%                      |
| Station 11 | 1.05%                      |
| Station 12 | 2.45%                      |
| Station 13 | 62.64%                     |
| Station 14 | 5.98%                      |
| Station 15 | 1.17%                      |
| Station 16 | 3.17%                      |
| Station 17 | 2.52%                      |
| Station 18 | 5.75%                      |
| Station 19 | 6.32%                      |
| Station 20 | 11.15%                     |

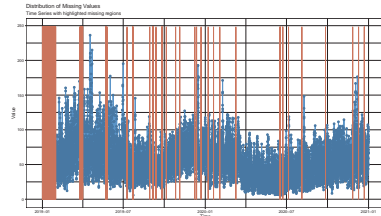

(a) Missing values distribution

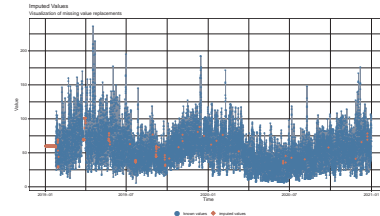

(b) Missing values imputation

Figure S1: **Station 1 NO<sub>2</sub> concentration:** A) Missing values distribution: The missing regions are highlighted. B) Missing values imputation: visualization of missing value replacements

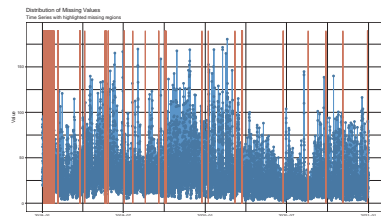

(a) Missing values distribution

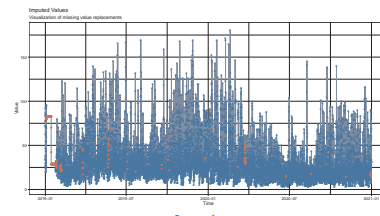

(b) Missing values imputation

Figure S2: **Station 2 NO<sub>2</sub> concentration:** A) Missing values distribution: The missing regions are highlighted. B) Missing values imputation: visualization of missing value replacements

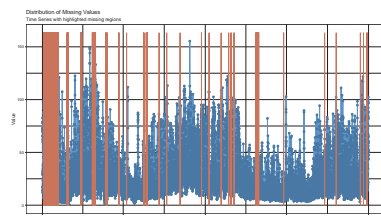

(a) Missing values distribution

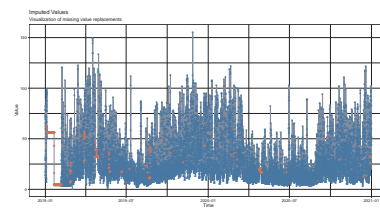

(b) Missing values imputation

Figure S3: **Station 3 NO<sub>2</sub> concentration:** A) Missing values distribution: The missing regions are highlighted. B) Missing values imputation: visualization of missing value replacements

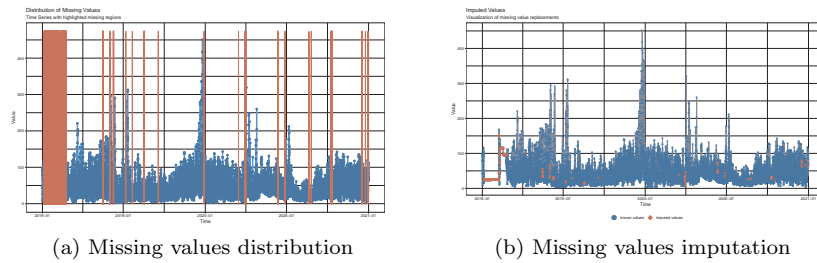

Figure S4: **Station 4 NO<sub>2</sub> concentration:** A) Missing values distribution: The missing regions are highlighted. B) Missing values imputation: visualization of missing value replacements

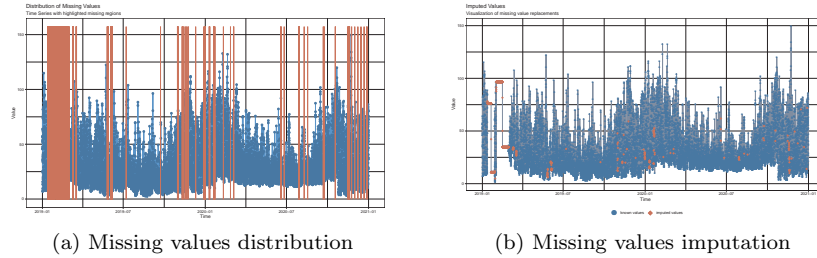

Figure S5: **Station 5 NO<sub>2</sub> concentration:** A) Missing values distribution: The missing regions are highlighted. B) Missing values imputation: visualization of missing value replacements

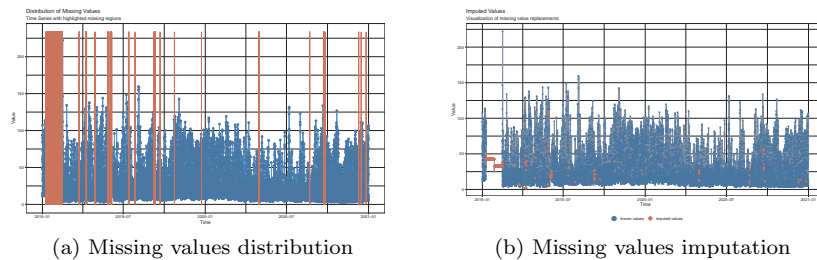

Figure S6: **Station 6 NO<sub>2</sub> concentration:** A) Missing values distribution: The missing regions are highlighted. B) Missing values imputation: visualization of missing value replacements

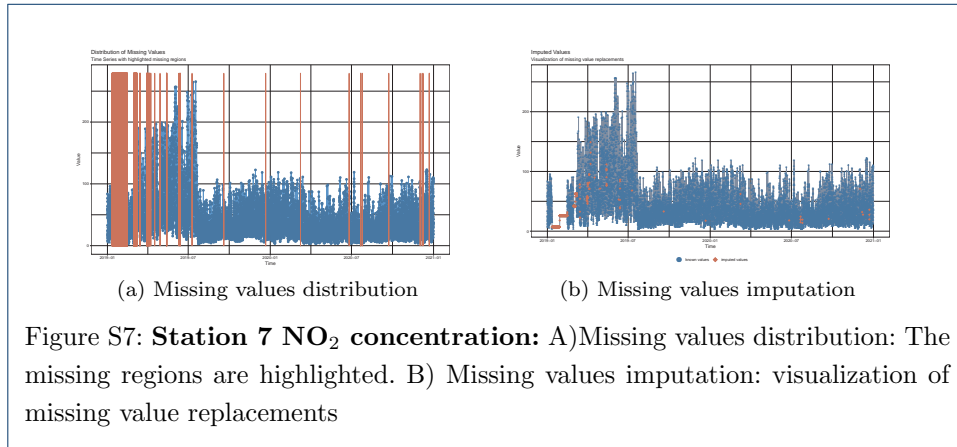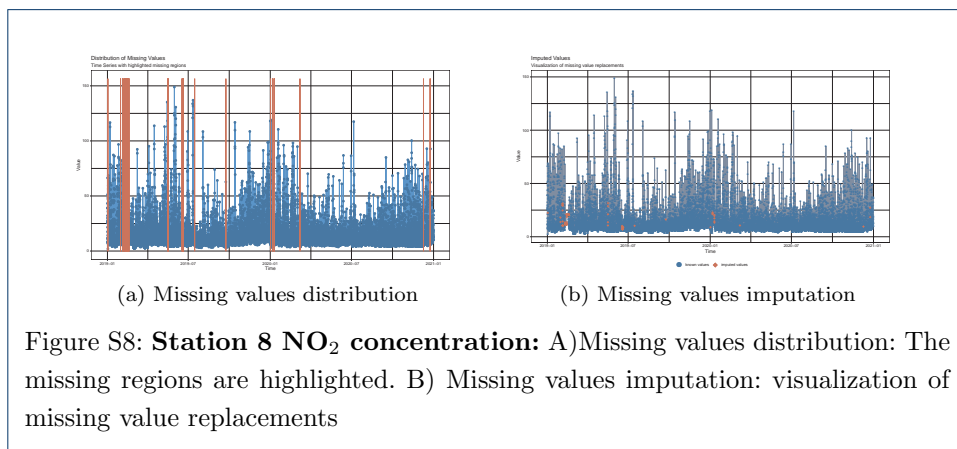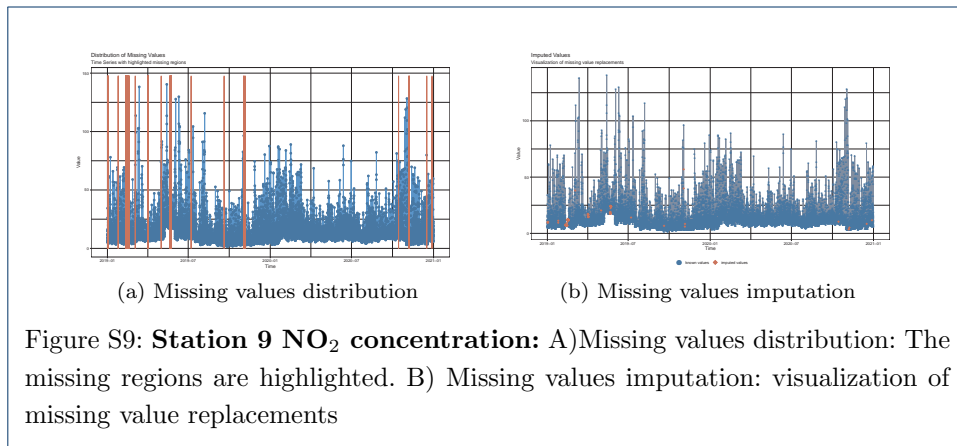

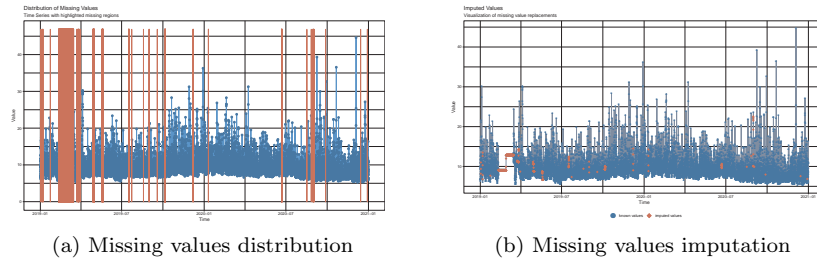

Figure S10: **Station 10 NO<sub>2</sub> concentration:** A) Missing values distribution: The missing regions are highlighted. B) Missing values imputation: visualization of missing value replacements

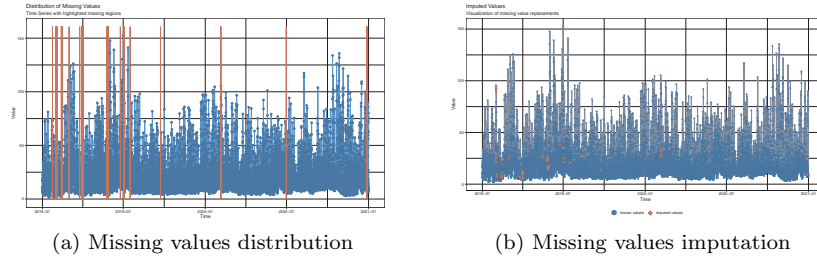

Figure S11: **Station 11 NO<sub>2</sub> concentration:** A) Missing values distribution: The missing regions are highlighted. B) Missing values imputation: visualization of missing value replacements

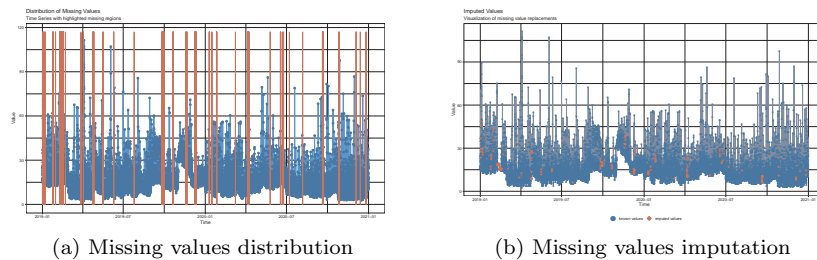

Figure S12: **Station 12 NO<sub>2</sub> concentration:** A) Missing values distribution: The missing regions are highlighted. B) Missing values imputation: visualization of missing value replacements

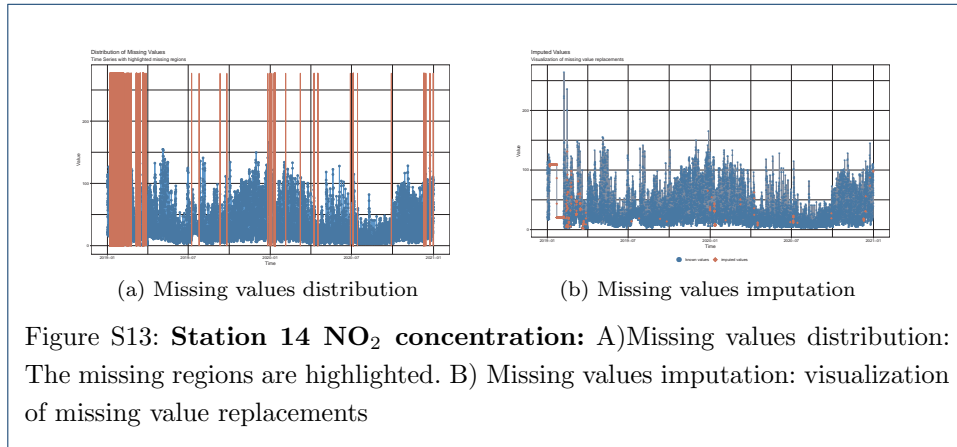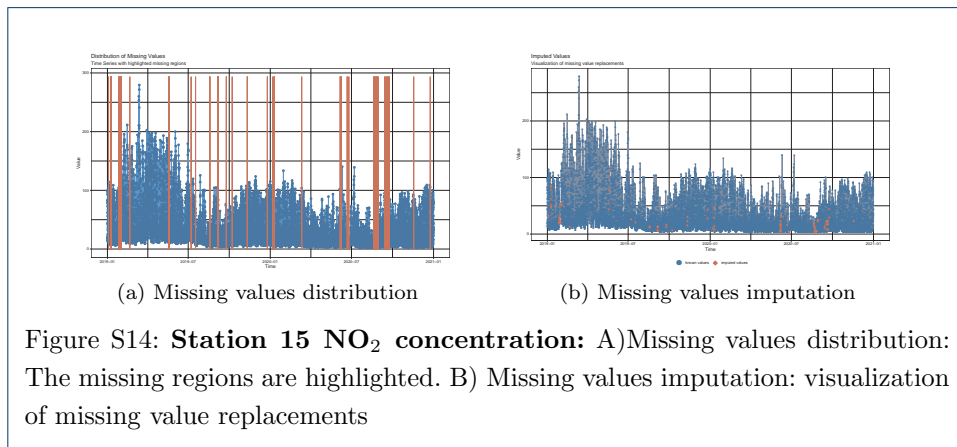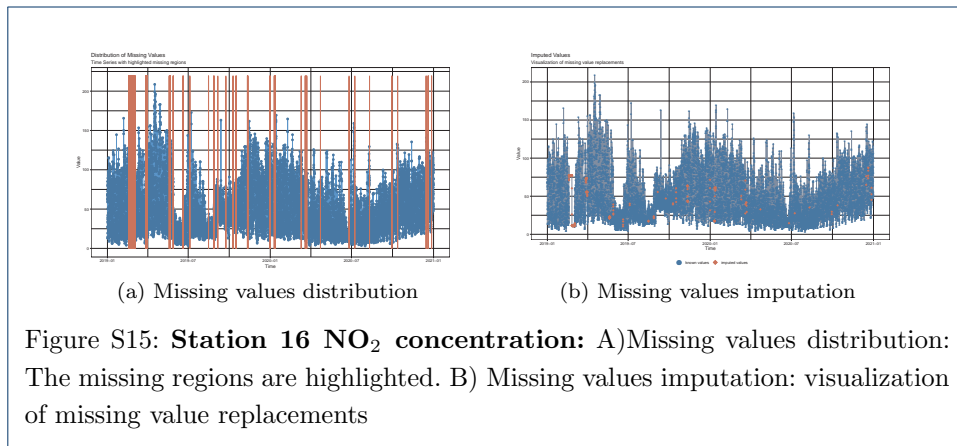

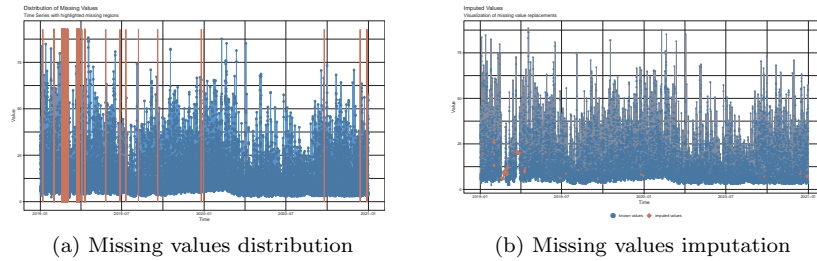

Figure S16: **Station 17 NO<sub>2</sub> concentration:** A)Missing values distribution: The missing regions are highlighted. B) Missing values imputation: visualization of missing value replacements

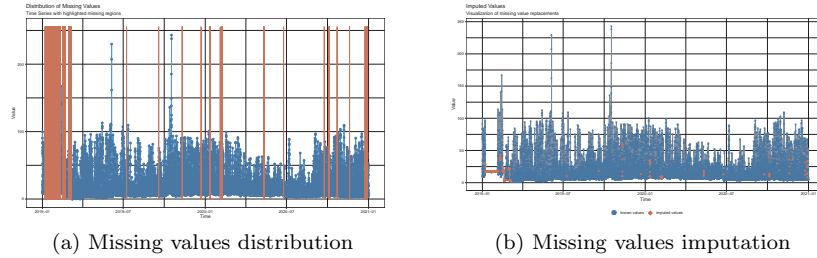

Figure S17: **Station 18 NO<sub>2</sub> concentration:** A)Missing values distribution: The missing regions are highlighted. B) Missing values imputation: visualization of missing value replacements

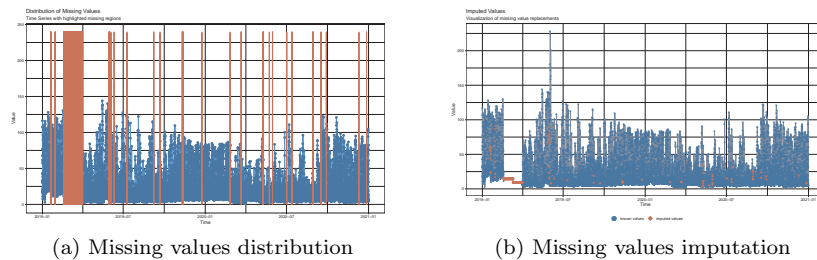

Figure S18: **Station 19 NO<sub>2</sub> concentration:** A)Missing values distribution: The missing regions are highlighted. B) Missing values imputation: visualization of missing value replacements

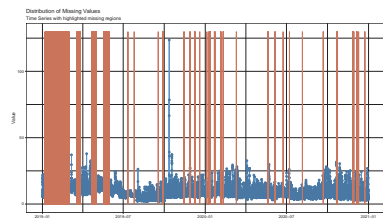

(a) Missing values distribution

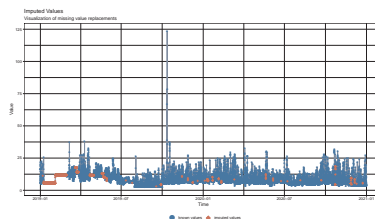

(b) Missing values imputation

Figure S19: **Station 20 NO<sub>2</sub> concentration:** A) Missing values distribution: The missing regions are highlighted. B) Missing values imputation: visualization of missing value replacements
